# Supplementary material for: Maternal Immunization Earlier in Pregnancy Maximizes Antibody Transfer and Expected Infant Seropositivity Against Pertussis
Source: PubMed Central journal article supplement — Clin Infect Dis. 2016 Jan 20;62(7):829–36. doi: 10.1093/cid/ciw027 (PMC4787611; doi:10.1093/cid/ciw027), 2016-01-20
Supplement: supp_ciw027_ciw027supp_fig1.pdf [file supp_ciw027_ciw027supp_fig1.pdf]

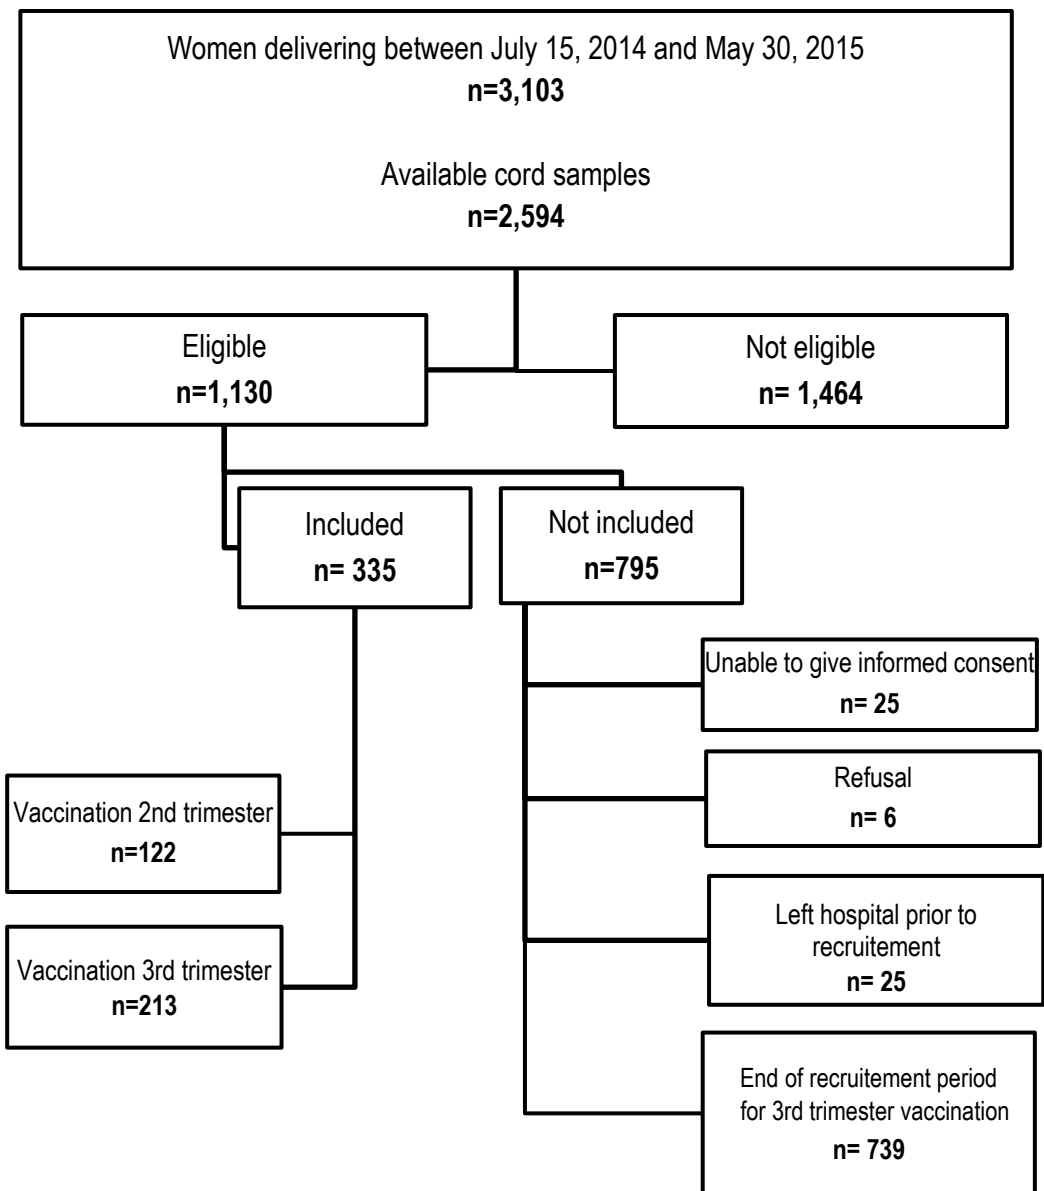

**Supplementary Figure 1. Study flowchart.**

Eligible samples (1,130, 44%) were cord-blood samples from term neonates born to women previously vaccinated with Tdap after gestational week 13.
